# Supplementary material for: Genome-Wide Association Study Identified Novel Candidate Loci/Genes Affecting Lodging Resistance in Rice
Source: MDPI journal article supplement (doi:10.3390/genes12050718), 2021-05-11
Supplement: s1 [file s1]

## Supplementary Figures and Tables

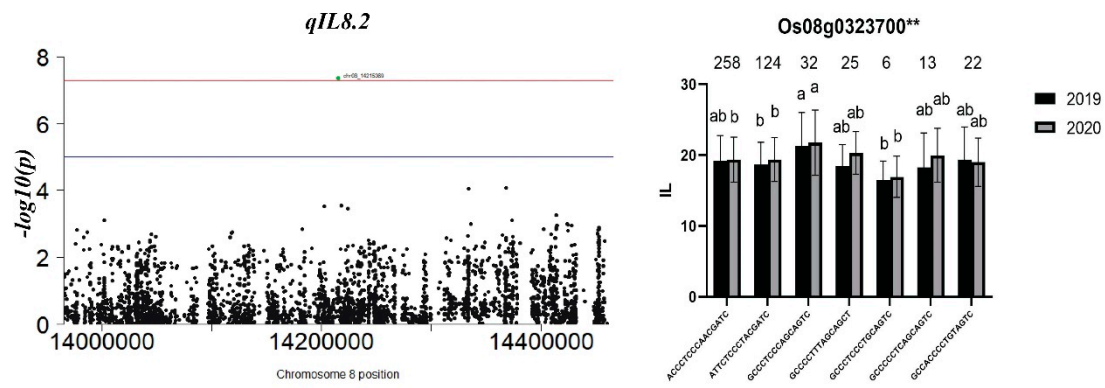

**Figure S1.** Gene-based association analysis of QTL(*qIL8.2*) loci and haplotypes analysis of targeted genes (*Os08g0323700*). The \*\* suggested significance of ANOVA (for  $\geq$  three haplotypes) or t-test (for two haplotypes) at  $p < 0.01$ . The letter on histogram (a, and b) indicated multiple comparisons result at the significant level 0.01. The value on the histogram was the number of individuals of each haplotype. Black and gray color indicated 2019 and 2020, respectively.

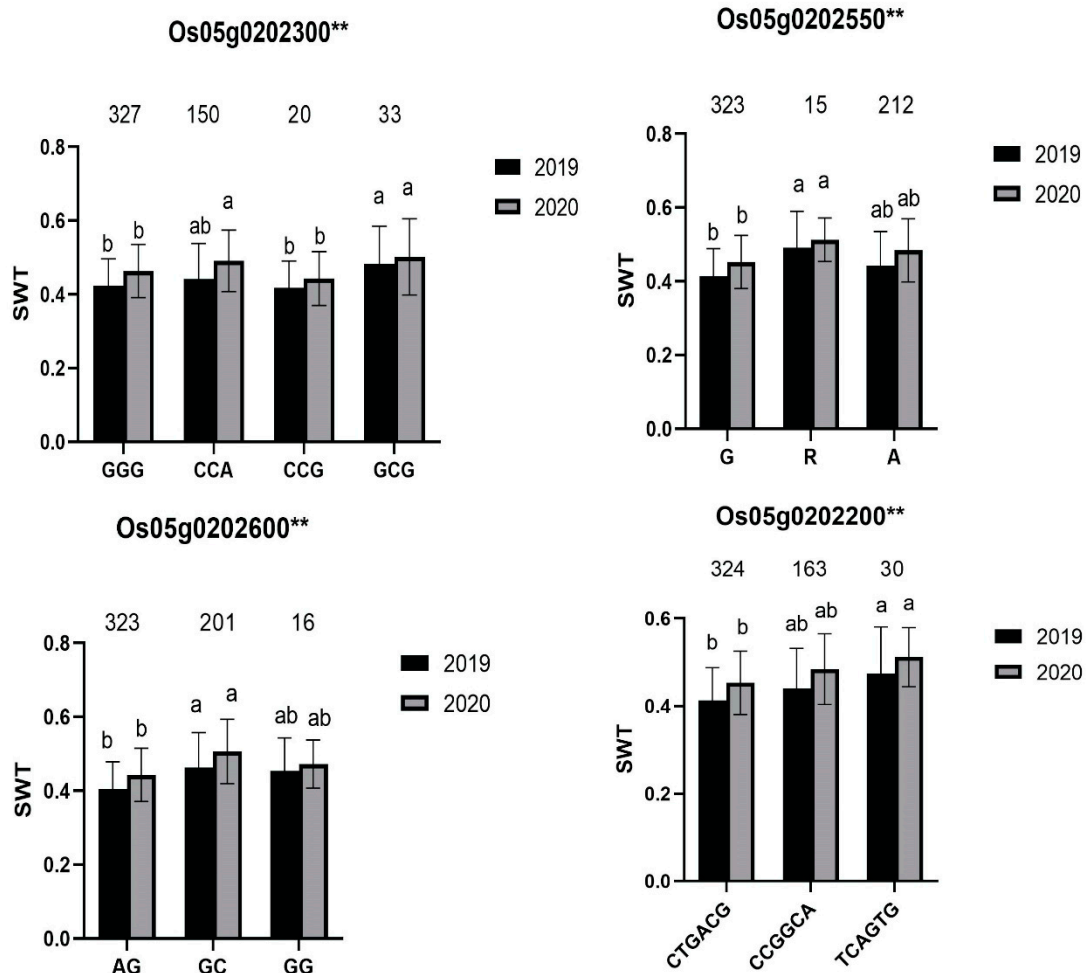

**Figure S2.** Haplotypes analysis of targeted genes of *qSWT5.2*. The \*\* suggested significance of ANOVA (for  $\geq$  three haplotypes) or t-test (for two haplotypes) at  $p < 0.01$ . The letter on histogram (a, and b) indicated multiple comparisons result at the significant level 0.01. The value on the histogram was the number of individuals of each haplotype. Black and gray color indicated 2019 and 2020, respectively.

## Os02g0516400

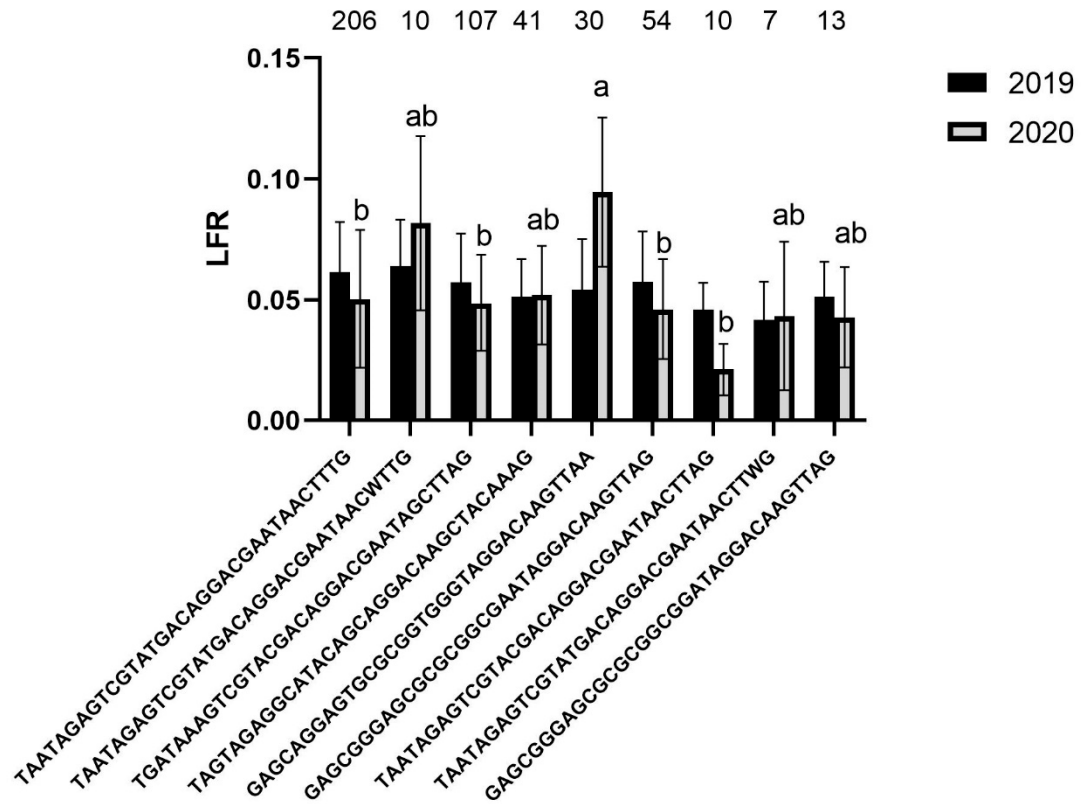

**Figure S3.** Haplotypes analysis of genes (*Os02g0516400*). The \*\* suggested significance of ANOVA (for  $\geq$  three haplotypes) or t-test (for two haplotypes) at  $p < 0.01$ . The letter on histogram (a, and b) indicated multiple comparisons result at the significant level 0.01. The value on the histogram was the number of individuals of each haplotype. Black and gray color indicated 2019 and 2020, respectively.

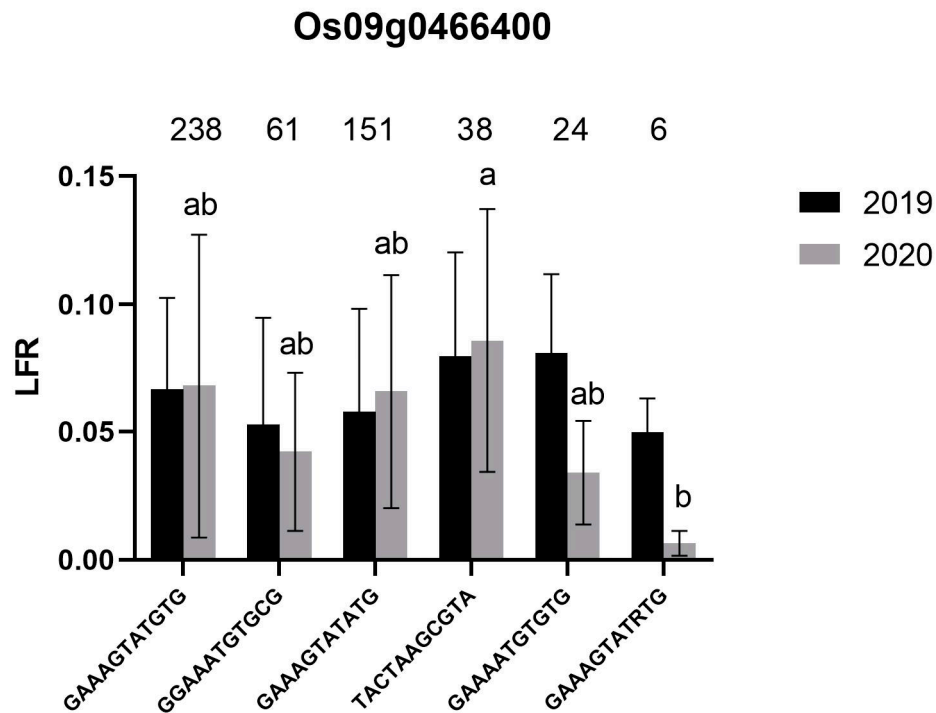

**Figure S4.** Haplotypes analysis of genes (*Os09g0466400*). The \*\* suggested significance of ANOVA (for  $\geq$  three haplotypes) or t-test (for two haplotypes) at  $p < 0.01$ . The letter on histogram (a, and b) indicated multiple comparisons result at the significant level 0.01. The value on the histogram was the number of individuals of each haplotype. Black and gray color indicated 2019 and 2020, respectively.

**Table S1.** List of the 550 varieties used this study

| Serial number | Variety name                   | Serial number | Variety name               |
|---------------|--------------------------------|---------------|----------------------------|
| Line 1        | Chenghui448                    | Line 276      | 3210                       |
| Line 2        | Budda                          | Line 277      | CN1067                     |
| Line 3        | Minghui63                      | Line 278      | IR 10120-7-2-1-4           |
| Line 4        | Chorofa                        | Line 279      | MBEIMBEIHUN                |
| Line 5        | D11                            | Line 280      | MURGI BRINJ                |
| Line 6        | D15                            | Line 281      | ZACATEPEC                  |
| Line 7        | KR200                          | Line 282      | 71011                      |
| Line 8        | 829                            | Line 283      | TAISEN GLUTINOUS YU 1157   |
| Line 9        | MERLE                          | Line 284      | FEDEARROZ 50               |
| Line 10       | RR 272-17-829                  | Line 285      | Kui630                     |
| Line 11       | K 479-2-3                      | Line 286      | Taizhong65/TaizhongHR539   |
| Line 12       | Zaoxian14                      | Line 287      | PR106                      |
| Line 13       | IRGA 959-1-2-2F-4-1-4A-6-CA-6X | Line 288      | Padi Ladang Ase Polo Komek |
| Line 14       | IR65600-27-1-2-2               | Line 289      | Chengnongshuijing          |
| Line 15       | Zhongjian100                   | Line 290      | LUBUK LINGGAU              |
| Line 16       | E 2040                         | Line 291      | Taizhongxianxuan2          |
| Line 17       | Guangluai4                     | Line 292      | CH1157                     |

|         |                       |          |                         |
|---------|-----------------------|----------|-------------------------|
| Line 18 | Zhongyouzao81         | Line 293 | Meihuanuo               |
| Line 19 | E ZI 96               | Line 294 | Muguanuo                |
| Line 20 | IRGA 370-38-1-1F-C4-2 | Line 295 | ARC 7425                |
| Line 21 | BHAINSA MUNDARIYA     | Line 296 | Xuanenchangtanqingzhan  |
| Line 22 | IR 2344-P1 PB-9-3-2B  | Line 297 | Baikehanhe              |
| Line 23 | Zhenshan97            | Line 298 | HSIEH-DAU               |
| Line 24 | ARROZVERMELHO         | Line 299 | SPR7284-57-5            |
| Line 25 | 117                   | Line 300 | AUS 449                 |
| Line 26 | MONOLAYA              | Line 301 | Xianghui91269           |
| Line 27 | OM997                 | Line 302 | R 762                   |
| Line 28 | LALSAITA              | Line 303 | SHWEWARHNAN             |
| Line 29 | IRGA 659-1-2-2-2      | Line 304 | BAI MANG AI ZHONG       |
| Line 30 | DANAU LAUT TAWAR      | Line 305 | Jing87-304              |
| Line 31 | IR 57920-AC-25-2-B    | Line 306 | R8006(Zhonghui8006)     |
| Line 32 | WAS 173-B-B-6-2-2     | Line 307 | IR36                    |
| Line 33 | ARAURE 1              | Line 308 | IR38 (IR2070-423-2-5-6) |
| Line 34 | AMISTAD 82            | Line 309 | IR64 (IR18348-36-3-3)   |
| Line 35 | ICTA CRISPO 38        | Line 310 | IR6                     |
| Line 36 | IR 75870-5-8-5-B-1    | Line 311 | IR72                    |
| Line 37 | IR77298-14-1-2        | Line 312 | Minghui86               |
| Line 38 | Bala                  | Line 313 | Kanghui63               |
| Line 39 | IR55419-04            | Line 314 | Luhui63                 |
| Line 40 | Matatag2              | Line 315 | Ce49 (Ce64-7-49)        |
| Line 41 | ARC 10100             | Line 316 | Ce64                    |
| Line 42 | UNNAMED               | Line 317 | Duohui1                 |
| Line 43 | Ajaya                 | Line 318 | Mianhui734              |
| Line 44 | P59279                | Line 319 | Wanhui88                |
| Line 45 | Guang122              | Line 320 | R288                    |
| Line 46 | IRAT144               | Line 321 | 6078 (Yuhui6078)        |
| Line 47 | 93072                 | Line 322 | Shengtai1               |
| Line 48 | Maravilha             | Line 323 | Hua-2                   |
| Line 49 | BG304                 | Line 324 | Manghui                 |
| Line 50 | YZX1                  | Line 325 | Zhenhui084              |
| Line 51 | 42686                 | Line 326 | R287                    |
| Line 52 | TKM 9                 | Line 327 | Chenghui178             |
| Line 53 | CHANDINA              | Line 328 | Enhui69                 |
| Line 54 | YA NONG ZAO 4         | Line 329 | R1128                   |
| Line 55 | YSBR1                 | Line 330 | II-32B                  |
| Line 56 | BD007                 | Line 331 | Jin23B                  |
| Line 57 | E 2024                | Line 332 | WuxiangB                |
| Line 58 | GLADIO                | Line 333 | V20B                    |
| Line 59 | Karnal Local          | Line 334 | BoB                     |
| Line 60 | Y134                  | Line 335 | MaxieB                  |
| Line 61 | Amol3(Sana)           | Line 336 | CTB                     |

|          |                      |          |                          |
|----------|----------------------|----------|--------------------------|
| Line 62  | Bg 300               | Line 337 | 898B                     |
| Line 63  | BEGMI 135            | Line 338 | 05CR89B                  |
| Line 64  | YZX2                 | Line 339 | EjinB                    |
| Line 65  | IR64a                | Line 340 | Ezao18                   |
| Line 66  | CALIFORNIA BELLE     | Line 341 | Yue4B                    |
| Line 67  | WAS 206-B-B-2-2-1    | Line 342 | Runzhu537 (Ezhong5)      |
| Line 68  | WAS 198-B-3-1-3      | Line 343 | Yuxiangzhan              |
| Line 69  | IR 56                | Line 344 | Xiangdao                 |
| Line 70  | IR8192-200-3-3-1-1   | Line 345 | Molixiangzhan            |
| Line 71  | BA SHI ZAO           | Line 346 | Gaodanbaixiangdao        |
| Line 72  | Y075                 | Line 347 | Jianzhen2                |
| Line 73  | NERICA-L-27          | Line 348 | BG304                    |
| Line 74  | Molizhanxuan         | Line 349 | Bataixiangzhan           |
| Line 75  | Wanxian763           | Line 350 | Huhan3                   |
| Line 76  | CT 6510-24-1-2       | Line 351 | Yangdao4                 |
| Line 77  | SONA(IET 1991)       | Line 352 | Milyang83 (Miyang83)     |
| Line 78  | Fengaizhan           | Line 353 | Wenshengnuo              |
| Line 79  | Yuxiangzhan          | Line 354 | Ewan13                   |
| Line 80  | Hnankar              | Line 355 | Wen229                   |
| Line 81  | IR68552-55-3-2       | Line 356 | Zaoyou143 ( Xiangzao143) |
| Line 82  | OM1706               | Line 357 | Yuanfengzao              |
| Line 83  | IRBB7                | Line 358 | Enhui58                  |
| Line 84  | IR64-IL              | Line 359 | Guanghui380              |
| Line 85  | IR68897B             | Line 360 | Guanghui880              |
| Line 86  | PSBRC82              | Line 361 | 158B                     |
| Line 87  | NERICA-L-1           | Line 362 | 814B (Jingchu814B)       |
| Line 88  | Huhan15              | Line 363 | Miyang83                 |
| Line 89  | Giza14               | Line 364 | Gunong2923               |
| Line 90  | UPL RI-7             | Line 365 | Guojisuo1                |
| Line 91  | B 6144-MR-6-0-0      | Line 366 | Guooyou12                |
| Line 92  | GIZA 178             | Line 367 | #02428                   |
| Line 93  | SAMBALA MALO         | Line 368 | Zhaiyeqing8              |
| Line 94  | WAS 199-B-1-2-1      | Line 369 | Forbiprotife             |
| Line 95  | IRI 339              | Line 370 | Ezao6                    |
| Line 96  | IR 57514-PMI 5-B-1-2 | Line 371 | Ezao11                   |
| Line 97  | Jiangxisimiao        | Line 372 | Xiangzaoxian21           |
| Line 98  | X21                  | Line 373 | Zhengui                  |
| Line 99  | C70                  | Line 374 | ShijinB                  |
| Line 100 | LX2007               | Line 375 | Taizhong1                |
| Line 101 | MAYBELLE             | Line 376 | Tetep (Tetepu)           |
| Line 102 | EX FOILAEIN(NAPUTO)  | Line 377 | Digu                     |
| Line 103 | IR 21015-72-3-3-1    | Line 378 | C101LAC                  |
| Line 104 | UPR 1201-1-20-1      | Line 379 | 75-1-127                 |
| Line 105 | RPW9-4(SS1)          | Line 380 | CBB23                    |

|          |                     |          |                  |
|----------|---------------------|----------|------------------|
| Line 106 | R644                | Line 381 | IRBB21           |
| Line 107 | Carijo              | Line 382 | Feng986          |
| Line 108 | IET1444             | Line 383 | Aizaizhan        |
| Line 109 | Ganwanxian37 (926)  | Line 384 | Guongchangai3784 |
| Line 110 | Huangsizhan         | Line 385 | Qingfengai       |
| Line 111 | IR 2003-P7-7-4-2    | Line 386 | Jiangerai        |
| Line 112 | SANHUANGZHAN NO 2   | Line 387 | Qingerai         |
| Line 113 | IR 80310-12-B-1-3-B | Line 388 | Jiduilun         |
| Line 114 | Bg90-2              | Line 389 | Kuoyedao         |
| Line 115 | Govind              | Line 390 | Yeqinglun        |
| Line 116 | NSIC RC9 (APO)      | Line 391 | Lucai            |
| Line 117 | Hua565              | Line 392 | Huanan15         |
| Line 118 | PT60                | Line 393 | Guangchangai4182 |
| Line 119 | KinandangPatong     | Line 394 | Huiyangai49      |
| Line 120 | BR11                | Line 395 | Zhaoyangzao18    |
| Line 121 | Huajingxian74       | Line 396 | Guichao2         |
| Line 122 | IR66897B            | Line 397 | Guangchang13     |
| Line 123 | IR58025B            | Line 398 | Fengqingai       |
| Line 124 | Qb_604              | Line 399 | Qingnongai       |
| Line 125 | Zhonghua1           | Line 400 | Fengaizhan1      |
| Line 126 | KCD1                | Line 401 | Huanghuazhan     |
| Line 127 | Nionoka             | Line 402 | Huangxinzhazhan  |
| Line 128 | CYPRESS             | Line 403 | 28zhan           |
| Line 129 | Shwe Thwe Yin Hyv   | Line 404 | Fenghuazhan      |
| Line 130 | PSBRC88             | Line 405 | Qingliuai1       |
| Line 131 | R106                | Line 406 | Fengbaizhan      |
| Line 132 | X23                 | Line 407 | Changsizhan      |
| Line 133 | C71                 | Line 408 | Huasizhan        |
| Line 134 | IRBB62              | Line 409 | Yangdao2         |
| Line 135 | ZH5                 | Line 410 | Teqing           |
| Line 136 | Jincouzhuxing       | Line 411 | Yangdao6         |
| Line 137 | NPT-100             | Line 412 | Sadu-cho         |
| Line 138 | EPEAL 102           | Line 413 | Shan-Huang Zhan  |
| Line 139 | WP65                | Line 414 | IR64             |
| Line 140 | PATISAIL            | Line 415 | N22              |
| Line 141 | 2004                | Line 416 | Aijiaonante      |
| Line 142 | At354               | Line 417 | Guangluai4       |
| Line 143 | IR74                | Line 418 | Dianrui409B      |
| Line 144 | 1088                | Line 419 | 88B              |
| Line 145 | Hua564              | Line 420 | Xianghui91269    |
| Line 146 | E 2070              | Line 421 | Lucai            |
| Line 147 | Erjiunan1           | Line 422 | Chengduai3       |
| Line 148 | Lai nok kha         | Line 423 | Jiabala          |
| Line 149 | XIANG CHANG ZAO     | Line 424 | Taishannuo       |

|          |                             |          |                   |
|----------|-----------------------------|----------|-------------------|
| Line 150 | CHINA 1039<br>MUTANT(DWARF) | Line 425 | Guichao2          |
| Line 151 | Aijiaonante                 | Line 426 | Luke3             |
| Line 152 | LIU LI YOU                  | Line 427 | Teqingxuanhui     |
| Line 153 | RONG DAO 4                  | Line 428 | Huangsiguizhan    |
| Line 154 | LUO AI ZAO 3                | Line 429 | Xiangwanxian3     |
| Line 155 | M 6034-1                    | Line 430 | Jinyou1           |
| Line 156 | KWANG-LU-AI 4               | Line 431 | Chengnongshuijing |
| Line 157 | E ZI 32                     | Line 432 | Momi              |
| Line 158 | Guangluai4                  | Line 433 | Sanbaili          |
| Line 159 | JinnanteB                   | Line 434 | Liusha1           |
| Line 160 | Sanbaili                    | Line 435 | Dongtingwanxian   |
| Line 161 | HUO QING                    | Line 436 | Yangdao2          |
| Line 162 | L 301B                      | Line 437 | Liushizao         |
| Line 163 | SXC216                      | Line 438 | Taizhongxianxuan2 |
| Line 164 | Yuenanzaodao                | Line 439 | Nante             |
| Line 165 | Chaoyang1B                  | Line 440 | Heidu4            |
| Line 166 | Jinnante43B                 | Line 441 | Jinnante43B       |
| Line 167 | Jiangnongzao1B              | Line 442 | 80B               |
| Line 168 | AN FU ZHAN                  | Line 443 | Aituogu151        |
| Line 169 | ZhuzhenB                    | Line 444 | Menjiading2       |
| Line 170 | Zaoxian240                  | Line 445 | Jiefangxian       |
| Line 171 | Baoxie-7B                   | Line 446 | Baikhualuo        |
| Line 172 | LONG GE 33                  | Line 447 | Liuyezhan         |
| Line 173 | Gzhenshan97B                | Line 448 | Zhenshan97        |
| Line 174 | KANGRI                      | Line 449 | Minghui63         |
| Line 175 | Xiangzaoxiang7              | Line 450 | 9311              |
| Line 176 | Aus/boro                    | Line 451 | IRAT109           |
| Line 177 | Zaoshunonghu6               | Line 452 | Huajingxian74     |
| Line 178 | DECHANGBYEO                 | Line 453 | Zihui100          |
| Line 179 | Lucai                       | Line 454 | Varylava          |
| Line 180 | Qiuqianbai                  | Line 455 | D62B              |
| Line 181 | AIJIAONANTE                 | Line 456 | G46B              |
| Line 182 | IR 9747 SEL                 | Line 457 | IR58025B          |
| Line 183 | HONG YANG ZAO 3             | Line 458 | Zhong9B           |
| Line 184 | Dongtingwanxian             | Line 459 | Xiang5            |
| Line 185 | Shufeng101                  | Line 460 | Menjiagao2        |
| Line 186 | XiangaiB                    | Line 461 | Exiang1           |
| Line 187 | ZHAO DAN AI                 | Line 462 | H198-yeza         |
| Line 188 | Zhenfu8                     | Line 463 | Huangxiuzhan      |
| Line 189 | Chenwan3                    | Line 464 | Shuhui527         |
| Line 190 | Xiangwanxian1               | Line 465 | Shuhui288         |
| Line 191 | KAMULI                      | Line 466 | Shuhui707         |
| Line 192 | CN44-40-7                   | Line 467 | Longhui11         |

|          |                       |          |                   |
|----------|-----------------------|----------|-------------------|
| Line 193 | SI WAN 14             | Line 468 | Nanhui511         |
| Line 194 | CR579-1-3             | Line 469 | Xianghui529       |
| Line 195 | KABERI                | Line 470 | Jinhui275         |
| Line 196 | Sililanka1            | Line 471 | Shanhui287        |
| Line 197 | LIANG GUANG           | Line 472 | Shanhui8281       |
| Line 198 | SHUANG BAI AI 2       | Line 473 | 205R              |
| Line 199 | SUNAR                 | Line 474 | 781R              |
| Line 200 | W 398                 | Line 475 | 3301R             |
| Line 201 | Nante                 | Line 476 | IR24              |
| Line 202 | DA GU AI 7            | Line 477 | IR1544            |
| Line 203 | JIANG ER ZAO          | Line 478 | Gui630            |
| Line 204 | PJ110                 | Line 479 | Nanhui511         |
| Line 205 | GUANG XUAN LIU<br>HAO | Line 480 | Shuhui202         |
| Line 206 | ZUIHOU                | Line 481 | Chenghui727       |
| Line 207 | IR 77298-14-1-2-10    | Line 482 | Jinhui10          |
| Line 208 | Malaihong             | Line 483 | Jinhui18          |
| Line 209 | Dianrui409B           | Line 484 | Jinhui16          |
| Line 210 | 531                   | Line 485 | Jinhui35          |
| Line 211 | FACAGRO 406           | Line 486 | Wanhui88          |
| Line 212 | QUN XUAN ZAO          | Line 487 | Wanhui66          |
| Line 213 | IRAT 10               | Line 488 | Fuhui802          |
| Line 214 | Guangluai15-1         | Line 489 | Huhui602          |
| Line 215 | Mamagu                | Line 490 | Chenghui881       |
| Line 216 | ARC 11777             | Line 491 | Yihui3551         |
| Line 217 | FAN WU                | Line 492 | Fuhui838          |
| Line 218 | E ZI 110              | Line 493 | Minhui3301        |
| Line 219 | Xiaohonggu            | Line 494 | Yihui72           |
| Line 220 | Dangyu5               | Line 495 | Gui553            |
| Line 221 | 78 XUAN WU            | Line 496 | Chenghui3203      |
| Line 222 | KUNJUKUNJU            | Line 497 | Ehui108           |
| Line 223 | PERUBAK LUEY          | Line 498 | Huarun2           |
| Line 224 | RP20-12               | Line 499 | Ganghui988        |
| Line 225 | GZ 1368-5-4           | Line 500 | Wusansimiao       |
| Line 226 | Aituogu151            | Line 501 | E1573             |
| Line 227 | E ZI 100              | Line 502 | R-Zh              |
| Line 228 | CUN GU NUO            | Line 503 | S112xuan          |
| Line 229 | ITA 117               | Line 504 | Ewan17B           |
| Line 230 | NCS349                | Line 505 | EX MARABA-GURUKU  |
| Line 231 | QING TAI AI           | Line 506 | Haogelao          |
| Line 232 | PL 3165               | Line 507 | IR 28             |
| Line 233 | Xugunuo               | Line 508 | C418              |
| Line 234 | IR 19058-107-1        | Line 509 | KURULU WEE(WHITE) |
| Line 235 | IR 3839-1             | Line 510 | FIDJI             |



|          |                           |          |                            |
|----------|---------------------------|----------|----------------------------|
| Line 236 | RATNAGIRI 45-2            | Line 511 | TAK SUFAID                 |
| Line 237 | PORONG                    | Line 512 | SLAVA                      |
| Line 238 | TAICHUNG SEN-YU 214       | Line 513 | SAHEL 108                  |
| Line 239 | B 737G-KN-23-1            | Line 514 | BATHURI                    |
| Line 240 | IR 73571-3B-11-3-K2       | Line 515 | DALSUNG 41                 |
| Line 241 | LUAN DAO                  | Line 516 | DANGAR                     |
| Line 242 | Youzhan                   | Line 517 | B 6136-3-TB-0-1-5          |
| Line 243 | Chengduai3                | Line 518 | Zhongchao123               |
| Line 244 | 88B                       | Line 519 | Gang46B                    |
| Line 245 | Nanjing11                 | Line 520 | CO 39                      |
| Line 246 | Zhenxian232               | Line 521 | GRITNA                     |
| Line 247 | Liusha1                   | Line 522 | JAGLI BORO                 |
| Line 248 | BuleidaA-75               | Line 523 | Gaozi                      |
| Line 249 | Wanhong1                  | Line 524 | BINUHANGIN                 |
| Line 250 | JIN HUA 258               | Line 525 | Yanghei3                   |
| Line 251 | KA GIL                    | Line 526 | Zixiang3                   |
| Line 252 | AR 133                    | Line 527 | Hongxiang2                 |
| Line 253 | HSINCHU AI CHIO<br>CHIENG | Line 528 | Lvxiang3                   |
| Line 254 | TAIPEI 167                | Line 529 | Huangxiang2                |
| Line 255 | IR 77186-122-2-2-3        | Line 530 | Hunanningxiangyuanzinuo    |
| Line 256 | Jiabala                   | Line 531 | Hunanningxiangchangzinuo   |
| Line 257 | Teqingxuanhui             | Line 532 | Guangximomi                |
| Line 258 | JWR 221                   | Line 533 | Niboerhuangdao             |
| Line 259 | Huangsiguizhan            | Line 534 | DYheidao                   |
| Line 260 | Gongju73                  | Line 535 | Jiangxishangraozixiangmi   |
| Line 261 | Luke3                     | Line 536 | Guangxishanglinhongxiangmi |
| Line 262 | BOUAKE 189                | Line 537 | Fujianyouxiheiguomi        |
| Line 263 | PDR 34-2-1-2              | Line 538 | Fujianyouxihongguomi       |
| Line 264 | NAN-ERH-AI 5              | Line 539 | Yuenanhongmi               |
| Line 265 | SI CHAO 1                 | Line 540 | Luhui17                    |
| Line 266 | TE SAN AI 2               | Line 541 | 15HP58                     |
| Line 267 | ALTAMIRA 9                | Line 542 | Luohui69                   |
| Line 268 | C 166-135                 | Line 543 | Zaohui43                   |
| Line 269 | IR 63295-AC 209-7         | Line 544 | Zaohui49                   |
| Line 270 | IR 5657-33-2              | Line 545 | R9519                      |
| Line 271 | TOS 9795                  | Line 546 | R5431                      |
| Line 272 | K 24                      | Line 547 | 900                        |
| Line 273 | 13946(GUANG-QIU 15)       | Line 548 | Feng9                      |
| Line 274 | RP 1570-44-1              | Line 549 | 1128                       |
| Line 275 | Guichao2                  | Line 550 | 9348                       |

Grey filling materials come from 3K RGP, in total of 327 varieties .

**Table S2.** QTL identified for traits in 2019 and 2020 in Wuhan, China.

| QTL             | year | CHROM | POS      | REF | ALT | Effect | SE    | p        |
|-----------------|------|-------|----------|-----|-----|--------|-------|----------|
| <i>qLFR2.1</i>  | 2019 | 2     | 4243076  | G   | A   | 0.06   | 0.011 | 1.17E-07 |
|                 | 2020 | 2     | 4461960  | G   | T   | 0.05   | 0.010 | 4.24E-08 |
| <i>qLFR2.2</i>  | 2019 | 2     | 7856970  | C   | T   | -0.02  | 0.004 | 1.85E-07 |
| <i>qLFR2.3</i>  | 2019 | 2     | 18545189 | A   | G   | 0.03   | 0.005 | 1.82E-07 |
| <i>qLFR3.1</i>  | 2020 | 3     | 7298950  | G   | A   | 0.08   | 0.012 | 1.48E-11 |
| <i>qLFR3.2</i>  | 2019 | 3     | 8085748  | T   | C   | 0.05   | 0.009 | 1.10E-08 |
| <i>qLFR3.3</i>  | 2019 | 3     | 13390842 | C   | A   | 0.03   | 0.005 | 1.59E-08 |
| <i>qLFR3.4</i>  | 2019 | 3     | 19705332 | A   | G   | 0.03   | 0.005 | 1.69E-08 |
| <i>qLFR3.5</i>  | 2019 | 3     | 36384565 | C   | A   | 0.03   | 0.005 | 2.23E-07 |
| <i>qLFR4.1</i>  | 2020 | 4     | 731040   | G   | A   | 0.06   | 0.011 | 1.66E-07 |
| <i>qLFR4.2</i>  | 2019 | 4     | 4933337  | A   | G   | 0.02   | 0.004 | 1.24E-07 |
| <i>qLFR4.3</i>  | 2019 | 4     | 7087567  | G   | A   | 0.02   | 0.004 | 6.56E-08 |
| <i>qLFR4.4</i>  | 2020 | 4     | 10939548 | T   | C   | 0.05   | 0.009 | 1.01E-08 |
| <i>qLFR4.5</i>  | 2019 | 4     | 25161106 | C   | T   | 0.03   | 0.006 | 2.62E-08 |
| <i>qLFR5.1</i>  | 2019 | 5     | 10941409 | G   | A   | 0.03   | 0.006 | 4.10E-08 |
| <i>qLFR5.2</i>  | 2019 | 5     | 15919313 | C   | T   | 0.04   | 0.006 | 2.59E-08 |
| <i>qLFR5.3</i>  | 2020 | 5     | 20540653 | A   | G   | 0.06   | 0.011 | 1.42E-08 |
|                 | 2019 | 5     | 20540653 | A   | G   | 0.05   | 0.009 | 4.64E-08 |
| <i>qLFR5.4</i>  | 2019 | 5     | 21734179 | G   | A   | 0.03   | 0.006 | 7.10E-10 |
| <i>qLFR5.5</i>  | 2019 | 5     | 23889281 | T   | C   | -0.02  | 0.004 | 1.80E-07 |
| <i>qLFR6.1</i>  | 2020 | 6     | 3467131  | G   | A   | 0.05   | 0.009 | 1.08E-09 |
| <i>qLFR6.2</i>  | 2019 | 6     | 15151322 | C   | T   | 0.03   | 0.006 | 2.31E-07 |
| <i>qLFR6.3</i>  | 2020 | 6     | 18858265 | A   | C   | 0.03   | 0.007 | 1.86E-07 |
| <i>qLFR7.1</i>  | 2019 | 7     | 7580625  | G   | A   | 0.03   | 0.006 | 2.34E-07 |
| <i>qLFR7.2</i>  | 2019 | 7     | 17459043 | C   | A   | 0.03   | 0.006 | 1.71E-07 |
| <i>qLFR7.3</i>  | 2020 | 7     | 19788362 | C   | A   | 0.03   | 0.007 | 5.20E-08 |
| <i>qLFR8.1</i>  | 2019 | 8     | 17303967 | T   | C   | 0.02   | 0.005 | 2.16E-07 |
| <i>qLFR8.2</i>  | 2019 | 8     | 27750738 | G   | A   | 0.04   | 0.007 | 1.33E-10 |
| <i>qLFR8.3</i>  | 2020 | 8     | 28136250 | G   | A   | 0.07   | 0.012 | 7.10E-13 |
| <i>qLFR9.1</i>  | 2019 | 9     | 17764668 | C   | A   | 0.04   | 0.006 | 3.06E-08 |
| <i>qLFR9.2</i>  | 2019 | 9     | 18757001 | T   | G   | 0.02   | 0.004 | 2.23E-07 |
| <i>qLFR10</i>   | 2020 | 10    | 11069031 | C   | A   | -0.05  | 0.009 | 2.48E-08 |
| <i>qLFR11.1</i> | 2019 | 11    | 2616479  | A   | G   | 0.03   | 0.005 | 6.98E-10 |
| <i>qLFR11.2</i> | 2019 | 11    | 3675601  | A   | T   | 0.02   | 0.005 | 1.68E-07 |
| <i>qLFR12</i>   | 2019 | 12    | 11842272 | G   | A   | 0.03   | 0.008 | 5.33E-11 |
| <i>qSID1</i>    | 2020 | 1     | 16559456 | T   | C   | 0.38   | 0.068 | 5.48E-08 |
| <i>qSID2</i>    | 2019 | 2     | 4246890  | C   | T   | -0.23  | 0.043 | 1.38E-09 |
| <i>qSID3</i>    | 2019 | 3     | 14025928 | A   | G   | -0.21  | 0.040 | 6.83E-09 |
| <i>qSID5.1</i>  | 2019 | 5     | 9683471  | T   | C   | 0.20   | 0.047 | 1.45E-07 |
| <i>qSID5.2</i>  | 2019 | 5     | 10353586 | G   | A   | 0.17   | 0.035 | 7.95E-08 |
| <i>qSID6.1</i>  | 2020 | 6     | 14785782 | T   | A   | 0.42   | 0.079 | 1.80E-07 |
| <i>qSID6.2</i>  | 2019 | 6     | 23317069 | C   | T   | 0.12   | 0.029 | 4.19E-08 |
| <i>qSID6.3</i>  | 2020 | 6     | 28754862 | G   | A   | 0.34   | 0.063 | 1.34E-07 |
| <i>qSID7</i>    | 2020 | 7     | 9226778  | C   | A   | 0.37   | 0.069 | 1.13E-07 |
| <i>qSID8.1</i>  | 2020 | 8     | 8673481  | G   | A   | 0.28   | 0.050 | 4.97E-08 |
|                 | 2019 | 8     | 8722341  | C   | T   | 0.35   | 0.053 | 1.32E-10 |
| <i>qSID8.2</i>  | 2019 | 8     | 14658311 | G   | A   | -0.30  | 0.060 | 2.43E-08 |
| <i>qSID8.3</i>  | 2020 | 8     | 23122614 | A   | C   | 0.40   | 0.076 | 1.87E-07 |
| <i>qSID9.1</i>  | 2019 | 9     | 17873714 | T   | C   | 0.25   | 0.049 | 6.83E-09 |
| <i>qSID9.2</i>  | 2019 | 9     | 21753476 | A   | G   | 0.21   | 0.032 | 1.54E-12 |
| <i>qSID10.1</i> | 2019 | 10    | 13419306 | T   | A   | 0.20   | 0.042 | 6.43E-08 |
| <i>qSID10.2</i> | 2019 | 10    | 14781430 | C   | T   | 0.22   | 0.042 | 9.49E-09 |
| <i>qSID12.1</i> | 2019 | 12    | 3325937  | T   | C   | -0.25  | 0.050 | 2.89E-09 |
| <i>qIL1.1</i>   | 2019 | 1     | 5920879  | C   | T   | 1.85   | 0.341 | 8.34E-08 |
| <i>qIL1.2</i>   | 2020 | 1     | 32933806 | G   | T   | 1.65   | 0.299 | 6.10E-08 |
|                 | 2019 | 1     | 32934166 | T   | C   | 1.61   | 0.300 | 1.39E-07 |

|                  |      |    |          |   |   |       |       |          |
|------------------|------|----|----------|---|---|-------|-------|----------|
| <i>qIL4.1</i>    | 2020 | 4  | 8874974  | A | T | 1.94  | 0.366 | 1.95E-07 |
| <i>qIL4.2</i>    | 2020 | 4  | 13394666 | C | T | 1.63  | 0.311 | 2.30E-07 |
| <i>qIL6</i>      | 2019 | 6  | 10410709 | A | G | 1.75  | 0.329 | 1.62E-07 |
| <i>qIL8.1</i>    | 2019 | 8  | 8396436  | C | T | 1.50  | 0.283 | 2.32E-07 |
|                  | 2020 | 8  | 8717396  | C | T | 1.75  | 0.334 | 1.84E-07 |
| <i>qIL8.2</i>    | 2020 | 8  | 14215369 | G | A | 1.70  | 0.304 | 4.22E-08 |
| <i>qIL8.3</i>    | 2019 | 8  | 19789417 | T | C | 1.11  | 0.209 | 1.72E-07 |
| <i>qIL8.4</i>    | 2019 | 8  | 20788042 | C | T | -3.43 | 0.648 | 1.82E-07 |
| <i>qIL9</i>      | 2019 | 9  | 9025294  | C | T | -2.42 | 0.422 | 1.75E-08 |
| <i>qSPAD5</i>    | 2020 | 5  | 11676591 | C | T | -2.85 | 0.514 | 4.72E-08 |
| <i>qSPAD6</i>    | 2020 | 6  | 6640251  | A | G | 1.65  | 0.312 | 1.96E-07 |
| <i>qSPAD7</i>    | 2019 | 7  | 5119605  | G | A | -1.12 | 0.212 | 1.92E-07 |
| <i>qSPAD10</i>   | 2019 | 10 | 121721   | A | G | -2.02 | 0.363 | 4.61E-08 |
| <i>qSPAD11.1</i> | 2020 | 11 | 27695597 | C | A | -1.54 | 0.284 | 1.00E-07 |
| <i>qSPAD11.2</i> | 2020 | 11 | 28410048 | A | G | -1.47 | 0.277 | 1.89E-07 |
| <i>qSWT1</i>     | 2019 | 1  | 7415781  | C | T | -0.04 | 0.009 | 1.73E-07 |
| <i>qSWT3</i>     | 2019 | 3  | 8841153  | T | G | 0.03  | 0.006 | 9.89E-08 |
| <i>qSWT4.1</i>   | 2019 | 4  | 5070468  | A | G | -0.02 | 0.004 | 1.20E-08 |
| <i>qSWT4.2</i>   | 2019 | 4  | 6029011  | C | T | -0.04 | 0.008 | 2.96E-08 |
| <i>qSWT4.3</i>   | 2019 | 4  | 29983581 | T | A | -0.03 | 0.008 | 1.59E-07 |
|                  | 2020 | 4  | 30459506 | A | G | -0.06 | 0.010 | 9.45E-08 |
| <i>qSWT4.4</i>   | 2019 | 4  | 31840365 | G | A | -0.03 | 0.005 | 2.56E-09 |
| <i>qSWT5.1</i>   | 2020 | 5  | 1755834  | T | C | 0.04  | 0.007 | 2.56E-08 |
| <i>qSWT5.2</i>   | 2020 | 5  | 6243695  | C | T | 0.02  | 0.004 | 1.27E-07 |
|                  | 2019 | 5  | 6245355  | C | T | 0.01  | 0.003 | 1.97E-08 |
| <i>qSWT5.3</i>   | 2020 | 5  | 8202592  | C | G | -0.05 | 0.009 | 1.09E-07 |
| <i>qSWT6</i>     | 2019 | 6  | 26041721 | T | C | 0.04  | 0.008 | 1.09E-08 |
| <i>qSWT7.1</i>   | 2019 | 7  | 16854258 | G | A | 0.04  | 0.007 | 1.92E-09 |
| <i>qSWT7.2</i>   | 2019 | 7  | 25723398 | C | A | -0.03 | 0.006 | 6.26E-09 |
| <i>qSWT7.3</i>   | 2019 | 7  | 28576217 | T | C | -0.07 | 0.013 | 2.06E-07 |
|                  | 2020 | 7  | 28576224 | T | C | -0.07 | 0.013 | 2.06E-07 |
| <i>qSWT8</i>     | 2019 | 8  | 7207333  | T | C | -0.02 | 0.004 | 1.06E-09 |
| <i>qSWT9</i>     | 2019 | 9  | 14136274 | C | T | -0.01 | 0.003 | 9.57E-08 |
| <i>qSWT12</i>    | 2019 | 12 | 8606248  | T | C | 0.05  | 0.010 | 1.69E-07 |
| <i>qFLW2</i>     | 2020 | 2  | 18692065 | T | C | 0.19  | 0.034 | 3.13E-08 |
| <i>qFLW3</i>     | 2020 | 5  | 20496180 | C | T | 0.17  | 0.031 | 1.35E-07 |
| <i>qFLW8</i>     | 2020 | 8  | 22563133 | T | C | 0.22  | 0.041 | 8.67E-08 |
|                  | 2019 | 8  | 22849319 | C | T | 0.21  | 0.038 | 4.24E-08 |
| <i>qFLA2.1</i>   | 2020 | 2  | 17841259 | C | T | 2.90  | 0.485 | 4.95E-09 |
| <i>qFLA2.2</i>   | 2020 | 2  | 26744192 | A | C | 1.70  | 0.299 | 2.53E-08 |
| <i>qFLA5.1</i>   | 2020 | 5  | 4747434  | G | A | 2.17  | 0.387 | 3.50E-08 |
| <i>qFLA5.2</i>   | 2020 | 5  | 17413706 | T | C | 2.16  | 0.362 | 4.92E-09 |

**Table S3.** Candidate genes for each QTL.

| <b>Traits</b> | <b>QTL</b>       | <b>Candidate genes</b>                                                                                                                                  |
|---------------|------------------|---------------------------------------------------------------------------------------------------------------------------------------------------------|
| IL            | <i>qIL1.1</i>    | <i>Os01g0208600</i>                                                                                                                                     |
|               | <i>qIL8.1</i>    | <i>Os08g0243100, Os08g0244500</i>                                                                                                                       |
|               | <i>qIL8.2</i>    | <i>Os08g0323700</i>                                                                                                                                     |
| SWT           | <i>qSWT5.2</i>   | <i>Os05g0200160, Os05g0200340, Os05g0200400,</i><br><i>Os05g0200500, Os05g0201300, Os05g0202200,</i><br><i>Os05g0202300, Os05g0202550 ,Os05g0202600</i> |
|               |                  |                                                                                                                                                         |
| SID           | <i>qSID8.1</i>   | <i>Os08g0243100, Os08g0243500</i>                                                                                                                       |
| LFR           | <i>qLFR2.3</i>   | <i>Os02g0516400</i>                                                                                                                                     |
|               | <i>qLFR9.1</i>   | <i>Os09g0471000, Os09g0471100 ,Os09g0471200</i>                                                                                                         |
| SPAD          | <i>qSPAD7</i>    | <i>Os07g0192000</i>                                                                                                                                     |
|               | <i>qSPAD11.1</i> | <i>Os11g0682600</i>                                                                                                                                     |
